# Supplementary material
Source: Springer Nature journal article supplement (https://www.springermedizin.de/resource/supplementary/12889_2014_6600_MOESM1_ESM.pdf/9498626)

■ Below 60min MVPA

▨ Above 60min MVPA

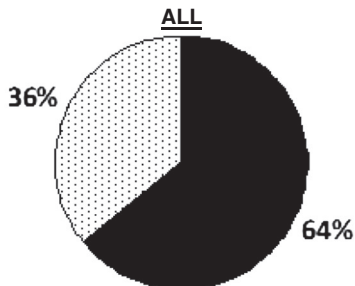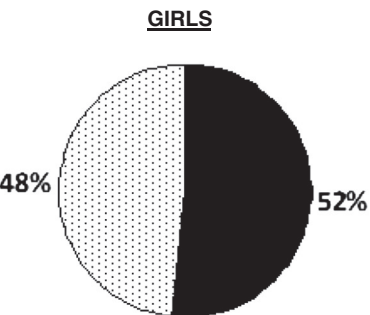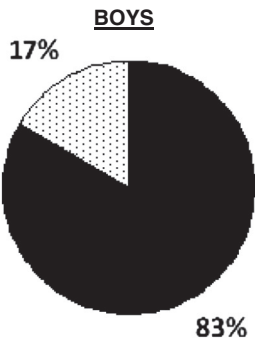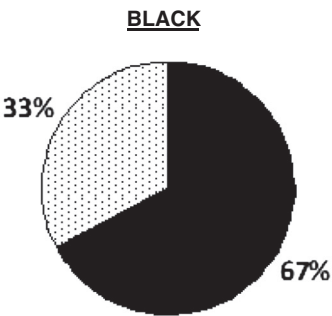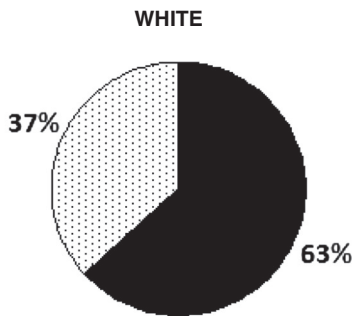

Supplement: MOESM1 [file 9498626]
